# Supplementary material for: Synchrotron X-ray Microprobes: An Application on Ancient Ceramics
Source: MDPI journal article supplement (doi:10.3390/app11178052), 2021-08-30
Supplement: s1 [file s1]

# Synchrotron X-ray Microprobes: An Application on Ancient Ceramics

Alessandra Gianoncelli <sup>1,\*</sup>, George Kourousias <sup>1</sup>, Sebastian Schöder <sup>2</sup>, Antonella Santostefano <sup>3</sup>,  
Maëva L'Hérondelle <sup>4</sup>, Germana Barone <sup>5</sup>, Paolo Mazzoleni <sup>5</sup> and Simona Raneri <sup>6</sup>

<sup>1</sup> Elettra—Sincrotrone Trieste, Strada Statale 14, km 163.5 in Area Science Park, 34149 Basovizza-Trieste, Italy; george.kourousias@elettra.eu

<sup>2</sup> Synchrotron SOLEIL, PUMA Beamline, Saint-Aubin BP48, CEDEX, 91192 Gif-sur-Yvette, France; sebastian.schoeder@synchrotron-soleil.fr

<sup>3</sup> Department of Ancient and Modern Civilizations, University of Messina, Polo Universitario SS Annunziata, 98168 Messina, Italy; antonellasantostefano@yahoo.it

<sup>4</sup> IPANEMA USR3461, CNRS, Université Paris-Saclay, Ministère de la Culture, UVSQ, MNHN, 91192 Saint-Aubin, France; maeva.lherondelle@synchrotron-soleil.fr

<sup>5</sup> Department of Biological, Geological and Environmental Sciences, University of Catania, Corso Italia 57, 95129 Catania, Italy; gbarone@unict.it (G.B.); pmazzol@unict.it (P.M.)

<sup>6</sup> Italian National Research Council, ICCOM-Pisa, Via G. Moruzzi, 1, 56124 Pisa, Italy; simona.raneri@pi.iccom.cnr.it

\* Correspondence: alessandra.gianoncelli@elettra.eu

## GEVN7 Attic

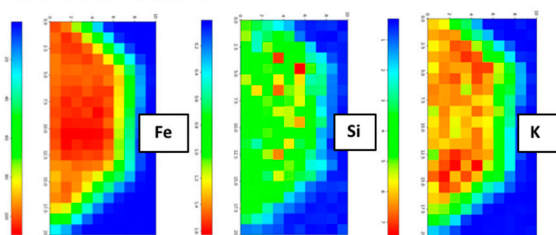

## GEVN10 Chalcidian

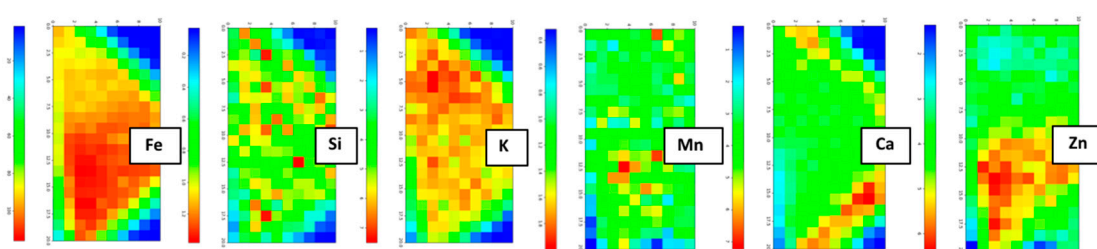

## ME70 Chalcidian

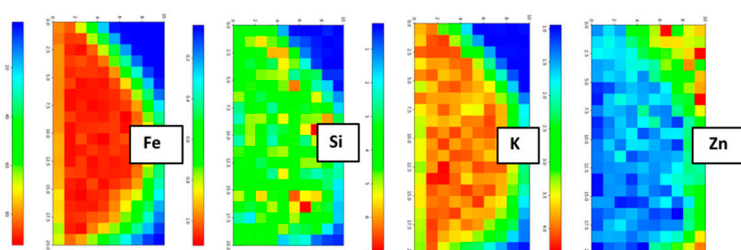

## GEL02. Laconic

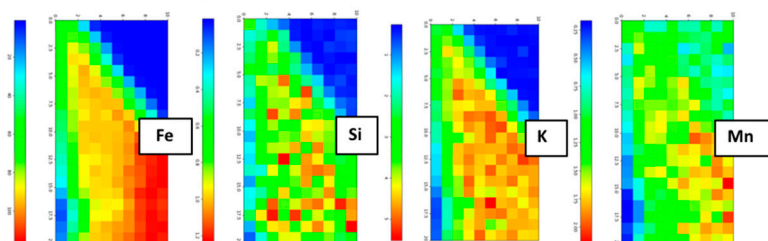

## GEVN16 Locrian(?)

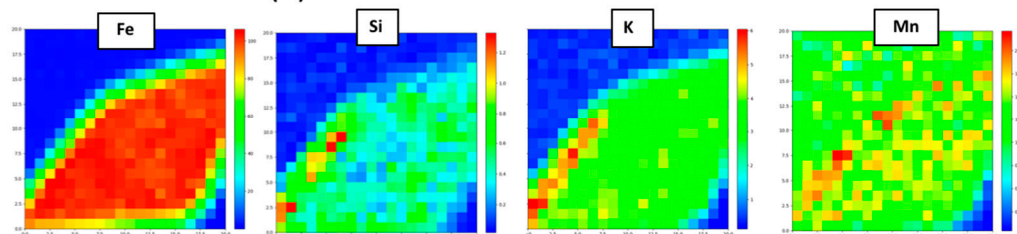

## GEVN14 Colonial/Sicily

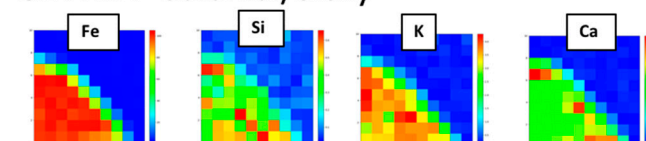

**Figure S1.** XRF maps acquired by Elio ©Bruker portable spectrometer on samples GEVN7, GEVN10, ME70, GEL2 and GEVN10.

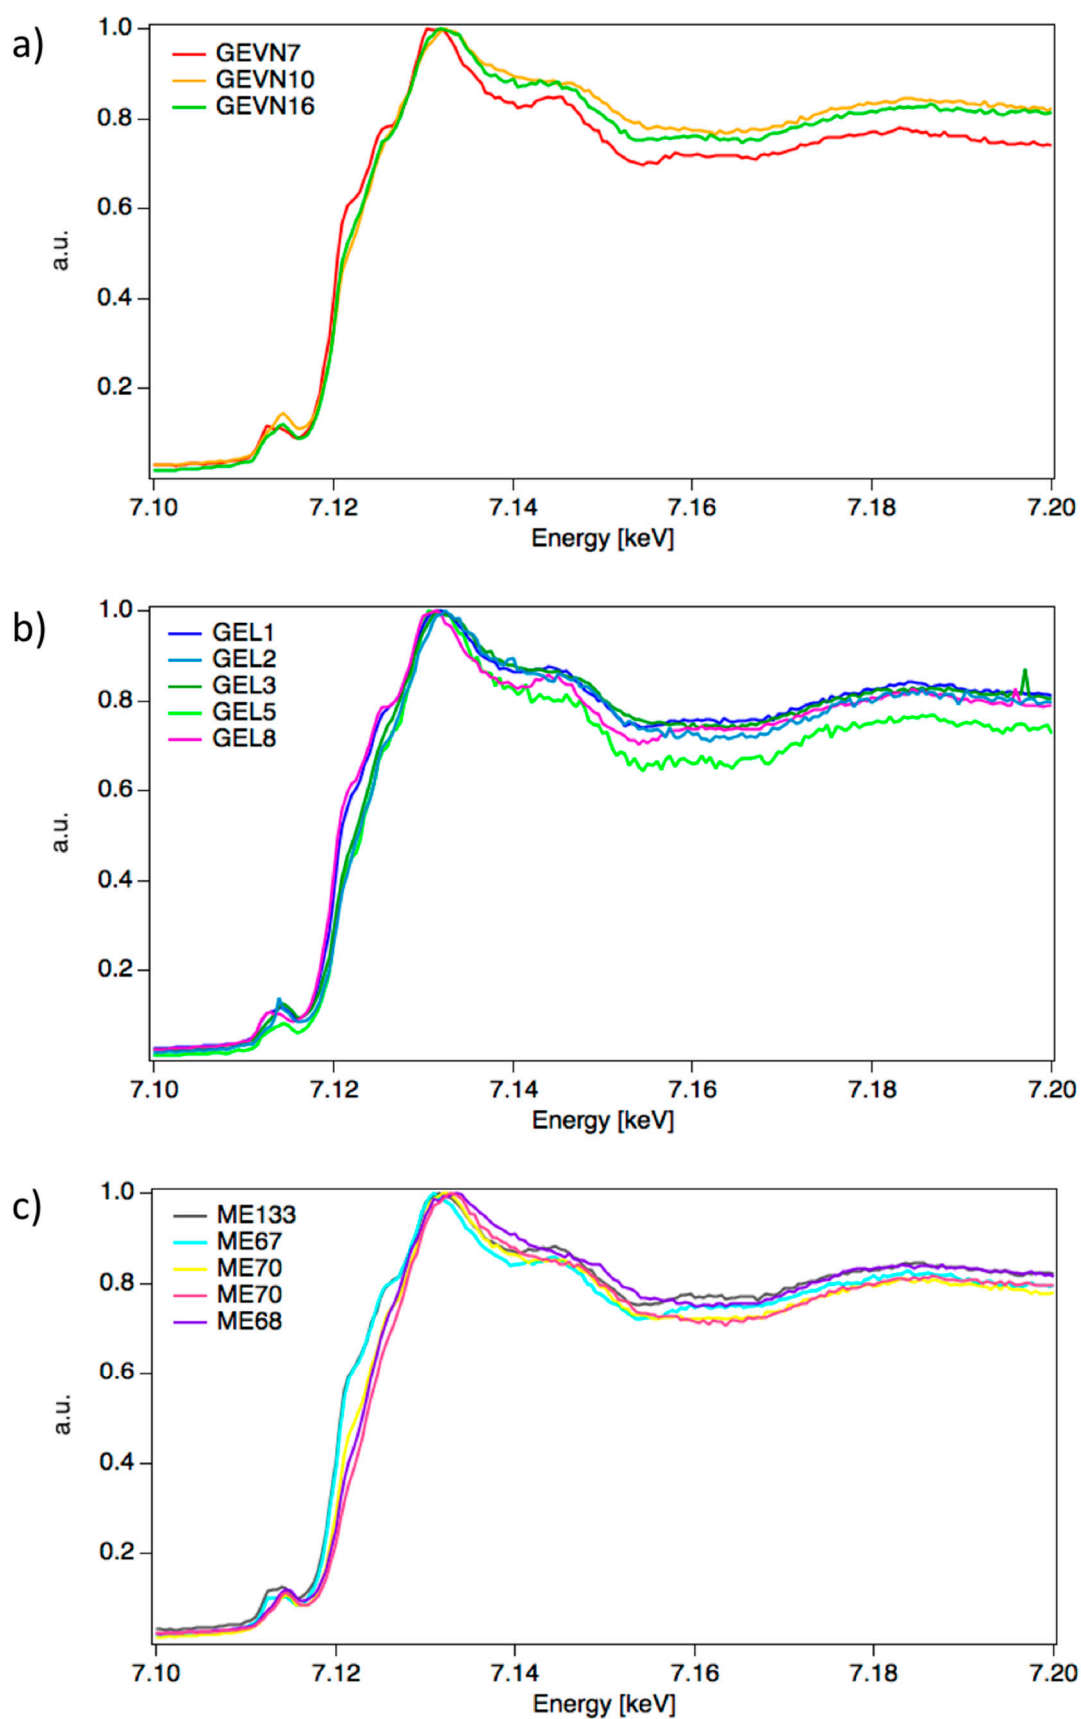

**Figure S2.** Fe-XANES point spectra collected on the gloss in cross-section geometry for GEVN (a), GEL (b) and ME (c) samples. The spectra were collected on a  $3\ \mu\text{m} \times 5\ \mu\text{m}$  area, across Fe K-edge, as detailed in materials and methods.

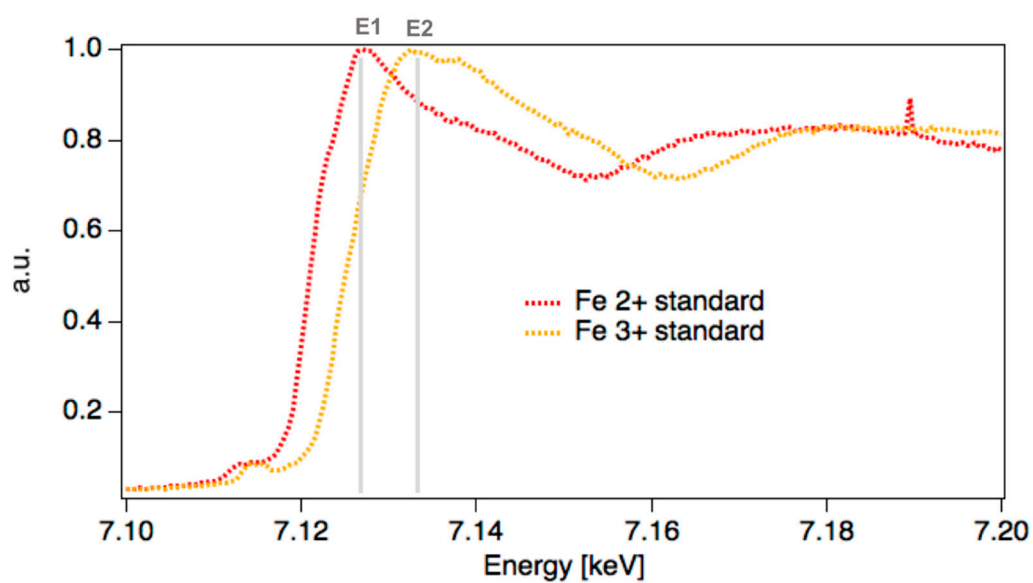

**Figure S3.** Fe-XANES spectra of  $\text{Fe}^{2+}$  and  $\text{Fe}^{3+}$  standard with the indication of the two energies E1 (7127 eV) and E2 (7132 eV), used to differentiate the contribution of the two phases in the XRF Fe XANES maps shown in Figure 3.

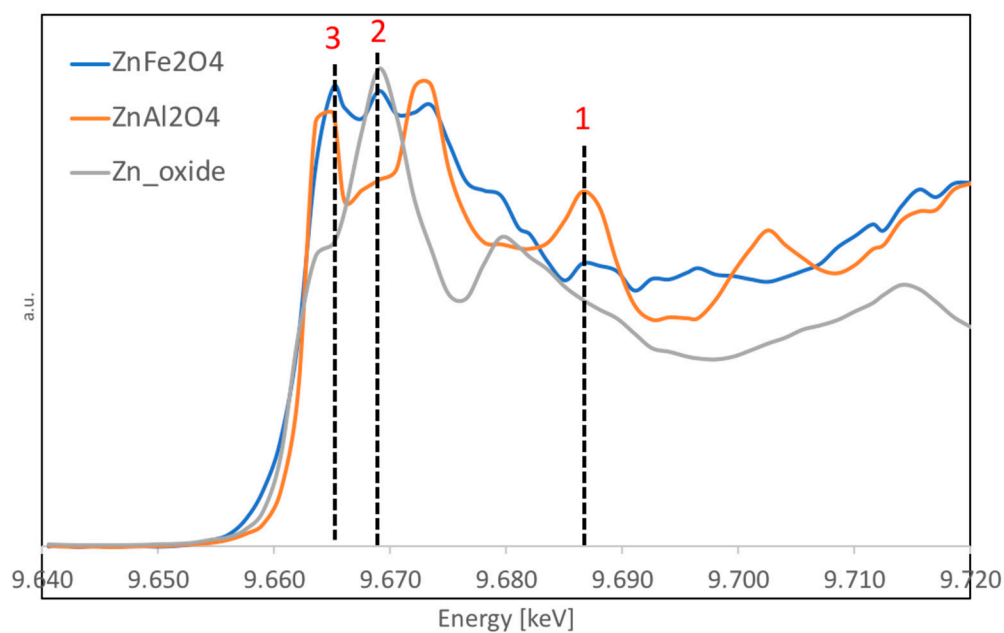

**Figure S4.** Zn K-edge XANES reference spectra from [43] where we indicated the energies chosen for the Zn XANES maps, later used to identify the predominant phase.

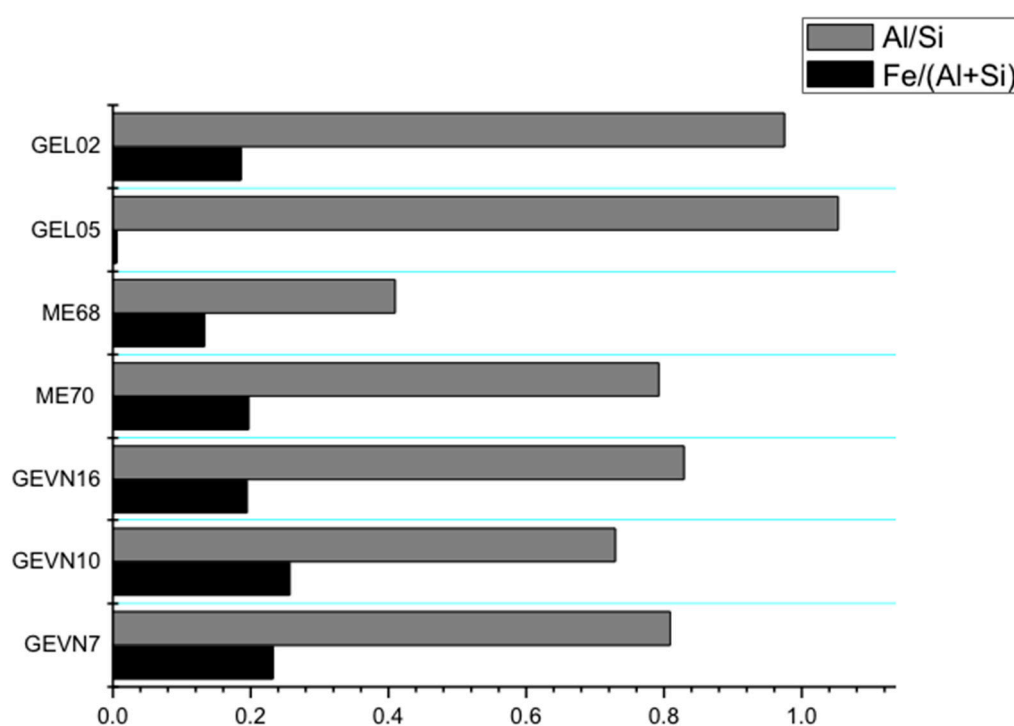

**Figure S5.** Si/Al and Fe(Si+Al) tenors in a selection of black gloss representative of the different identified products.
